# Supplementary material
Source: PubMed Central journal article supplement (PMC7364766)
Supplement: awaa160_supplementary_data.pdf [file awaa160_supplementary_data.pdf]

**MR imaging signatures of brain age and disease over the lifespan derived from a Deep Brain Network based on an international, diverse population of 14,468 individuals**

**Supplementary Materials**

**S.1. LifespanCN racial demographics**

*Suppl. table 1. Racial breakdown of the LifespanCN training set.*

*\*Note: not all participants had available race and ethnicity information.*

| <i>Dataset Name</i> | <b>Number of participants per racial group</b> |              |              |                     |              | <i>N/A*</i> |
|---------------------|------------------------------------------------|--------------|--------------|---------------------|--------------|-------------|
|                     | <i>Asian</i>                                   | <i>Black</i> | <i>White</i> | <i>Multi-Racial</i> | <i>Other</i> |             |
| ADC                 | 0                                              | 22           | 45           | 3                   | 0            | 9           |
| AIBL                | 0                                              | 0            | 0            | 0                   | 0            | 446         |
| BLSA-1.5T           | 0                                              | 2            | 20           | 0                   | 0            | 68          |
| BLSA-3T             | 0                                              | 21           | 90           | 0                   | 0            | 841         |
| CARDIA              | 0                                              | 291          | 428          | 0                   | 0            | 0           |
| PAC-JHU             | 0                                              | 1            | 94           | 0                   | 0            | 0           |
| PAC-WASH            | 0                                              | 0            | 224          | 0                   | 23           | 0           |
| PAC-WISC            | 0                                              | 2            | 124          | 0                   | 1            | 0           |
| PING                | 0                                              | 0            | 0            | 0                   | 0            | 398         |
| PNC                 | 0                                              | 521          | 568          | 0                   | 164          | 143         |
| SHIP                | 0                                              | 0            | 0            | 0                   | 0            | 2,739       |

## S.2. Comparison of alternative network architectures

*Suppl. table 2. Comparison of alternative network architectures. Performance on brain age prediction using LifespanCN dataset and network parameters.*

|              | <b>InceptionResNet-v2</b> | <b>DenseNet169</b> | <b>VGG16</b> | <b>ResNet50</b> |
|--------------|---------------------------|--------------------|--------------|-----------------|
| MAE          | <b>3.702</b>              | 3.795              | 4.319        | 3.850           |
| Correlation  | <b>0.978</b>              | 0.977              | 0.970        | 0.975           |
| # parameters | 55M                       | 14.3M              | 138M         | 25M             |
| Depth        | N/A ( 200)                | 169                | 16           | 50              |

### S.3. DeepBrainNet Brain Age prediction accuracy in different folds

*Suppl. table 3. Prediction accuracy in brain age prediction using LifespanCN dataset in different folds of cross-validation.*

| InceptionResNet-v2 |                 |             |                   |             |
|--------------------|-----------------|-------------|-------------------|-------------|
|                    | Slices Combined |             | Individual Slices |             |
|                    | MAE             | Correlation | MAE               | Correlation |
| CV1                | 3.681           | 0.977       | 4.530             | 0.961       |
| CV2                | 3.561           | 0.977       | 4.372             | 0.965       |
| CV3                | 3.664           | 0.978       | 4.263             | 0.967       |
| CV4                | 3.635           | 0.977       | 4.384             | 0.965       |
| CV5                | 3.969           | 0.979       | 4.407             | 0.965       |
| All                | 3.702           | 0.978       | 4.391             | 0.964       |

#### S.4. DeepBrainNet Brain Age deltas per site

Suppl. figure 1. Distribution of the Brain Age deltas per site.

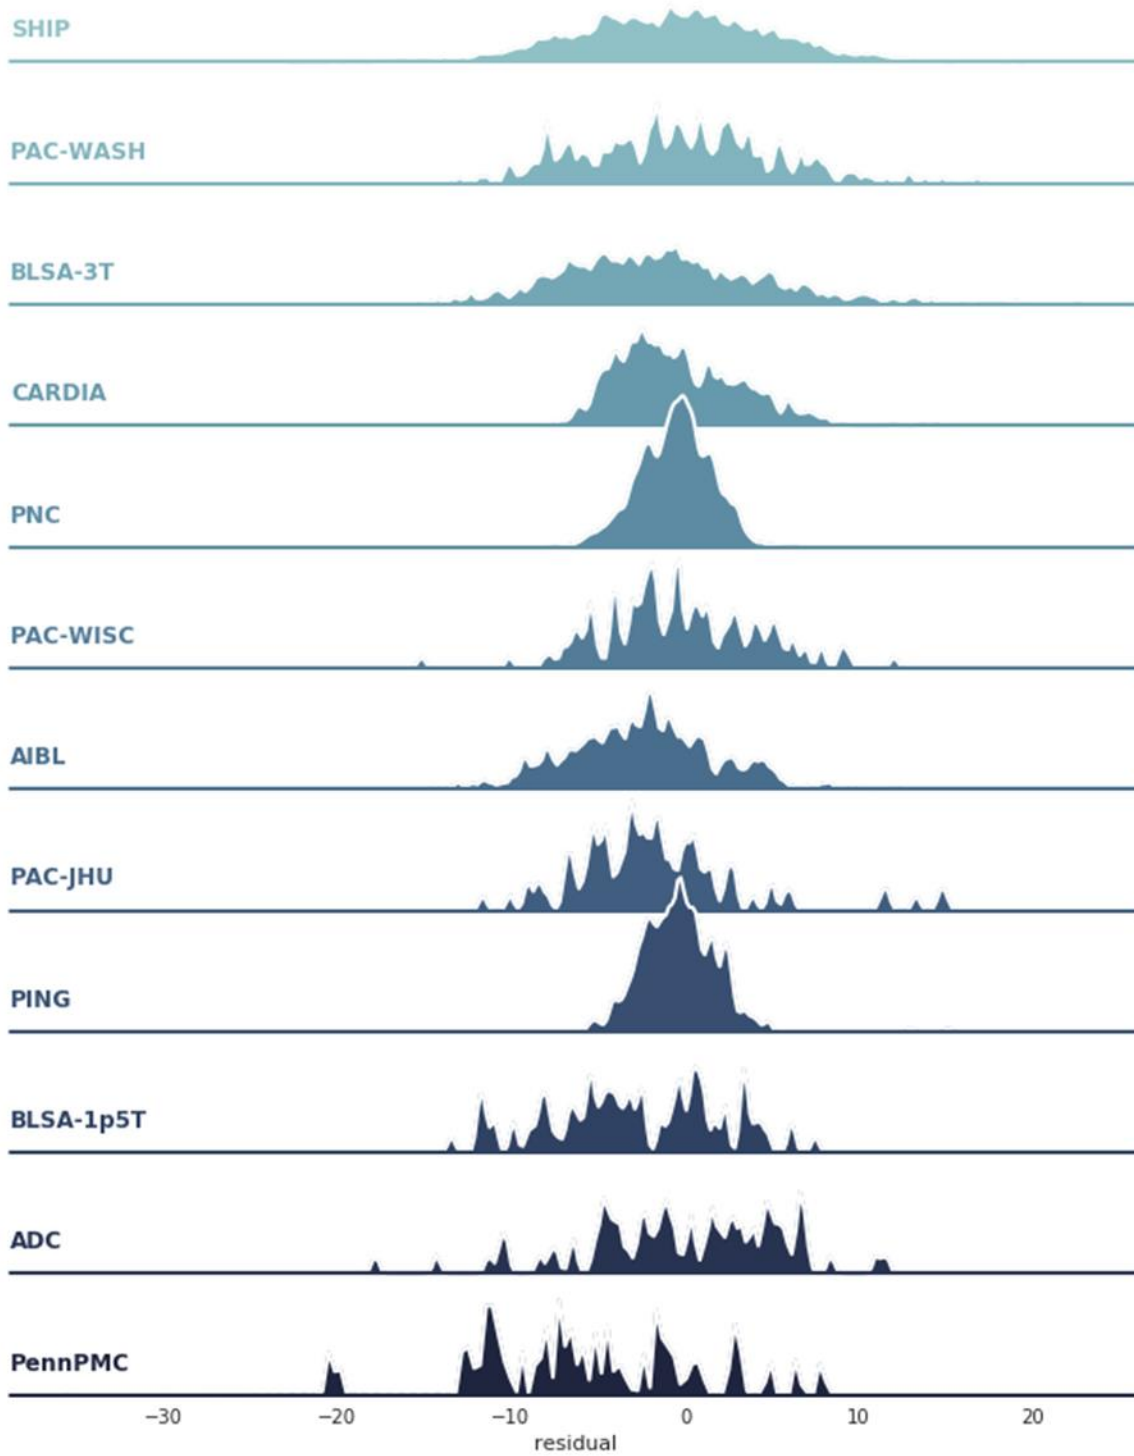

### S.5. Mean absolute error and mean error by gender

*Suppl. table 4. Summary statistics of brain age deltas for males and females for prediction using the LifespanCN set.*

|        | Mean absolute error | Mean error |
|--------|---------------------|------------|
| Male   | 3.68                | 0.03       |
| Female | 3.72                | -0.31      |

### ***S.6. Correlation of deltas with gender-specific models***

*Suppl. table 5. Correlation of deltas obtained from gender-specific models to deltas obtained from mixed-gender model. These gender-specific models were trained with LifespanCN set separated by gender (with 5-fold cross validation).*

| Model       | Delta Correlation |
|-------------|-------------------|
| Female only | 0.968             |
| Male only   | 0.977             |

### S.7. Effect of preprocessing on Brain Age predictions

*Suppl. table 6. Brain age prediction accuracy for minimally preprocessed versus preprocessed images. The table presents MAE for the LifespanCN predictions (with 5-fold cross-validation) and predictions on out sample dataset.*

| Processing                                                           | LifespanCN<br>cross-validated | SHIP<br>out of sample |
|----------------------------------------------------------------------|-------------------------------|-----------------------|
| Minimally preprocessed (Skull-stripping + linear alignment)          | 3.702                         | 4.120                 |
| Additional preprocessing (Bias correction + histogram normalization) | 3.698                         | 4.106                 |

### **S.8. Correlation of deltas obtained from age-specific models**

*Suppl. table 7. Correlation of deltas obtained from age-specific models to deltas obtained from full sample model. The development set contains 2 studies from LifespanCN and has subjects between 3 and 22 years old. The aging set contains 12 studies from LifespanCN and has subjects between 18 and 95 years old. These models were trained with 5-fold cross-validation.*

| Model                       | Delta Correlation |
|-----------------------------|-------------------|
| Developmental set           | 0.973             |
| Aging set delta correlation | 0.954             |



## S.9. Predictions from age-specific models

Suppl. figure 2. Plot of predictions obtained from age-specific models described in Suppl. Table 7.

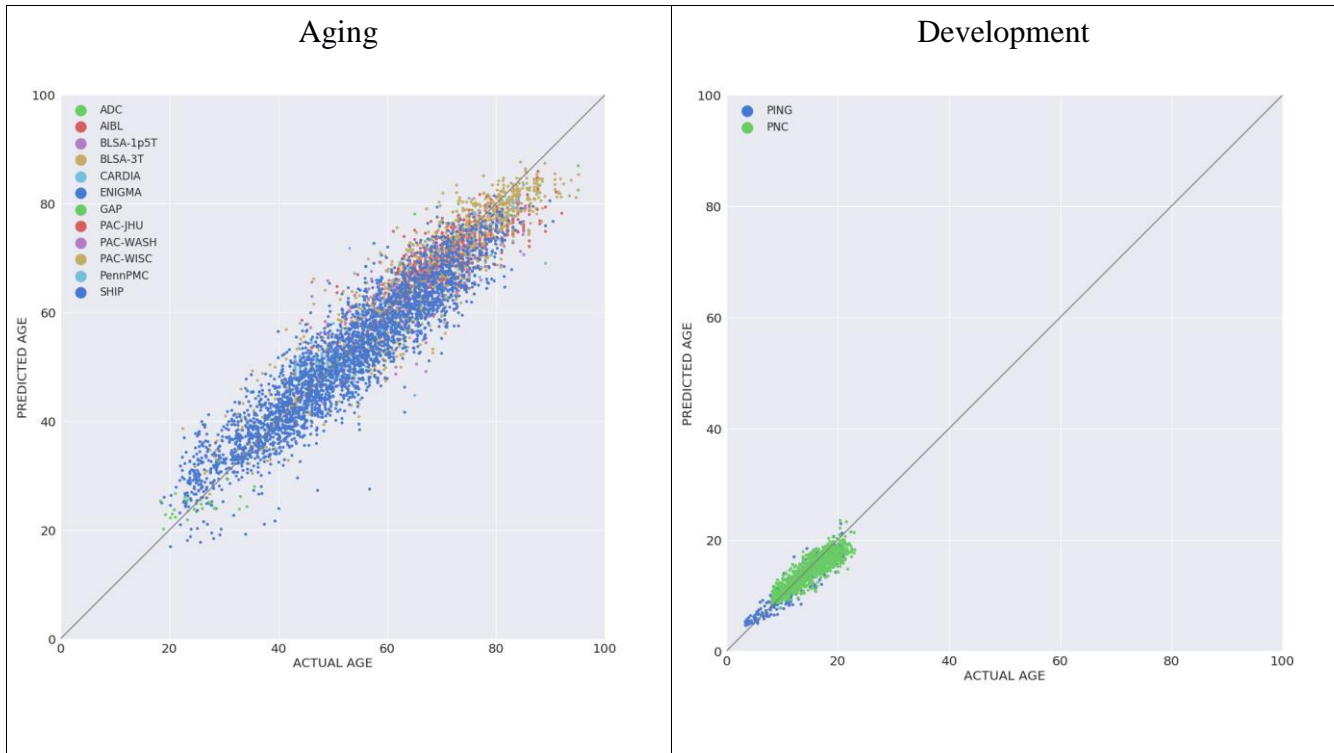

**S.10. Generalization of gender specific models to opposite gender**

*Suppl. table 8. Correlation of deltas obtained from opposite-sex models to deltas obtained from full sample model*

| Training | Testing | MAE   | Delta Correlation |
|----------|---------|-------|-------------------|
| Male     | Female  | 3.898 | 0.948             |
| Female   | Male    | 3.798 | 0.955             |

### S.11. Visualization of model activation

Suppl. figure 3. Saliency maps were computed by method described by [Simonyan 2014]. The computed gradients of each sample within the respective age range were averaged. Higher activation represents the importance of a region in prediction.

Reference: <https://arxiv.org/pdf/1312.6034v2.pdf>

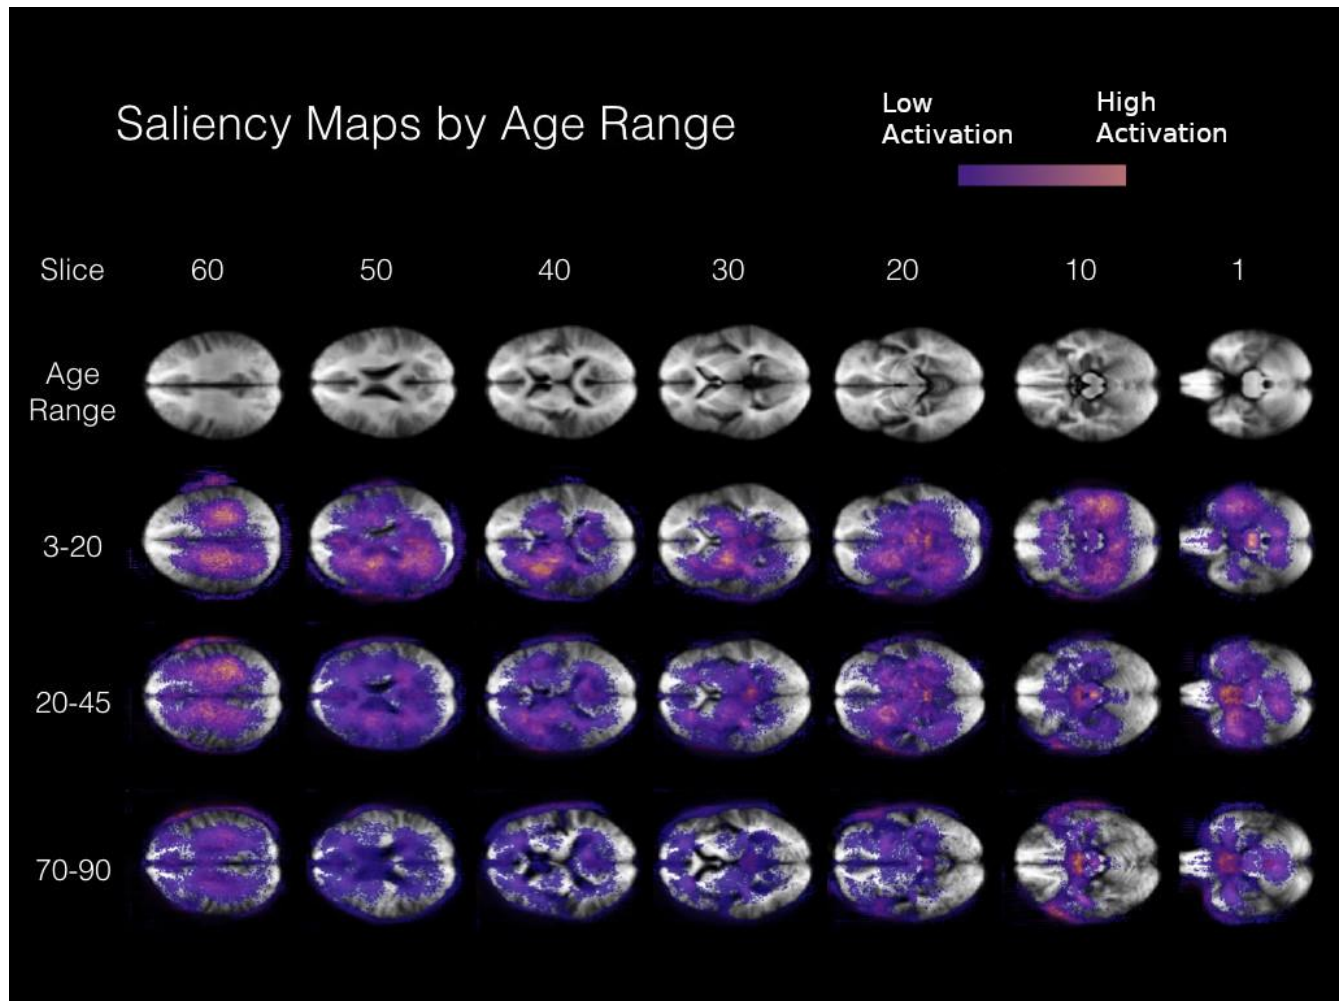

## S.12. Robustness of small sample experiments

*Suppl. table 9. Transfer learning experiments with sample sizes equal to or less than 100 were repeated to test robustness.*

| Experiment | N   | Accuracy     |          | AUC          |          |
|------------|-----|--------------|----------|--------------|----------|
|            |     | DeepBrainNet | ImageNet | DeepBrainNet | ImageNet |
| AD         | 100 | 0.78         | 0.67     | 0.84         | 0.71     |
| MCI        | 100 | 0.64         | 0.62     | 0.68         | 0.64     |
| SCZ        | 100 | 0.73         | 0.61     | 0.80         | 0.70     |
|            | 50  | 0.64**       | 0.59     | 0.72**       | 0.51     |

\* Scores reported are the average of 2 runs

\*\* At N=50 for SCZ, only one of the runs converged to the scores listed – Other run converged to baseline (52% - Accuracy)

### S.13. Mean Error of predictions for 3 levels of regularization

*Suppl. table 10. The mean absolute error, mean error, and Cohens'd effect sizes between disease and control for the 3 levels of fit shown in Figure 2.*

|               | Mean Absolute Error | Mean Error | Cohens'd | Cohens'd 95% CI |
|---------------|---------------------|------------|----------|-----------------|
| AD            | 4.81                | -1.94      | 1.19     | 0.98, 1.40      |
|               | 5.47                | -2.04      | 1.26     | 1.04, 1.48      |
|               | 7.14                | -4.78      | 1.16     | 0.95, 1.37      |
| MCI           | 4.14                | -1.62      | 0.52     | 0.32, 0.72      |
|               | 5.15                | -2.44      | 0.62     | 0.42, 0.82      |
|               | 6.26                | -4.66      | 0.55     | 0.35, 0.75      |
| Schizophrenia | 4.18                | 0.75       | 0.63     | 0.49, 0.77      |
|               | 7.67                | 1.68       | 0.79     | 0.65, 0.93      |
|               | 9.48                | 2.64       | 0.76     | 0.62, 0.90      |
| Depression    | 4.18                | 0.73       | 0.11     | 0.01, 0.21      |
|               | 7.27                | -4.11      | 0.12     | 0.02, 0.22      |
|               | 8.56                | -5.41      | 0.09     | -0.01, 0.19     |

#### S.14. Mixed-effects model testing for different model fits

Suppl. table 11. Results of a mixed-effects model used to determine which model fit captures the most differentiation in the residual values of controls versus disease subjects.

| Group         | Comparison       | Fit with most separation | p-value |
|---------------|------------------|--------------------------|---------|
| AD            | Middle vs. Tight | Middle fit               | 0.021   |
|               | Middle vs. Loose | Middle fit               | 0.017   |
|               | Loose vs. Tight  | Tight fit                | 0.311   |
| MCI           | Middle vs. Tight | Middle fit               | 0.043   |
|               | Middle vs. Loose | Middle fit               | 0.039   |
|               | Loose vs. Tight  | Loose fit                | 0.550   |
| Schizophrenia | Middle vs. Tight | Middle fit               | 0.074   |
|               | Middle vs. Loose | Middle fit               | 0.078   |
|               | Loose vs. Tight  | Loose fit                | 0.105   |
| Depression    | Middle vs. Tight | Middle fit               | 0.550   |
|               | Middle vs. Loose | Middle fit               | 0.472   |
|               | Loose vs. Tight  | Tight fit                | 0.508   |

We conduct appropriate testing to examine whether the brain age gap values differentiate disease (e.g., AD, MCI, Schizophrenia or Depression) and controls subjects, and whether such discrimination differ by the chose models (loose, middle and tight). Hence, we are testing the difference (by models) of the difference (by diagnosis) in brain age gaps.

We represent the brain age gap for subject  $i$  under model  $m$  ( $m=1,2,3$ ) as  $R_{i,m}$ .  $D_i$  is the binary disease indicator with value 1 for diseased subjects and 0 for controls.

$$R_{i,m} = c_m + b_m D_i * m + a_i + noise$$

For a specific model  $m$ ,  $c_m$  represents the average brain age gap among controls, and  $b_m$  represents the degree of differentiation in brain age gap comparing diseased versus controls.  $a_i$  is the random intercept that quantifies the subject-specific deviation of brain age gap from the population average.  $a_i$  is shared across all three model fits for each subject  $i$ , and takes care of the possible within-subject correlation in brain age gap values.

We further illustrate the above model under one particular scenario. That is, comparing loose fit ( $m=1$ ) and middle fit ( $m=2$ ) models in terms of their differentiation in AD versus controls.

Under the loose fit ( $m=1$ ),  
if subject  $i$  is a control subject ( $D_i=0$ ), then

$$R_{i,1,D_i=0} = c_1 + a_i + noise$$

if subject  $i$  is an AD subject ( $D_i=1$ ), then

$$R_{i,1,D_i=1} = c_1 + b_1 + a_i + noise$$

The average discrimination between AD vs. control under loose fit model is then the difference between the above  $b_1$ .

While using the middle fit model ( $m=2$ ),  
if subject  $i$  is a control subject, then

$$R_{i,2,D_i=0} = c_2 + a_i + noise$$

if subject  $i$  is an AD subject, then

$$R_{i,2,D_i=1} = c_2 + b_2 + a_i + noise$$

The average discrimination between AD vs. control under middle fit model is then the difference between the above  $b_2$ .

Hence to comparing middle fit and loose fit model, we will be testing the contrast of their discriminations under the null hypothesis that  $H_0: b_2 - b_1 = 0$ .

The significance of the differential discrimination from the mixed effects models were determined based on likelihood ratio (LRT) tests of the fixed effects.

The mixed effects model is used because the model-specific brain age gaps  $R_{i,m}$  are generated from the same subject's data. Hence for any pairwise comparison such as middle fit vs. tight fit, the data might be correlated within subject. Mixed effects models with the subject-specific random intercept  $a_i$  are known to provide valid inference for correlated outcome data.
